# Supplementary material for: Novel transcriptomic panel identifies histologically active eosinophilic oesophagitis
Source: PubMed Central journal article supplement — Gut. 2024 Apr 26;73(7):1076–86. doi: 10.1136/gutjnl-2023-331743 (PMC11187384; doi:10.1136/gutjnl-2023-331743), 2024-04-26
Supplement: gutjnl-2023-331743supp001.pdf [file gutjnl-2023-331743supp001.pdf]

## Suppl. Table 1

|  | Control<br>(n=5) | EoE Active<br>No fibrosis<br>(n=5) | EoE Active<br>Fibrosis<br>(n=5) | EoE Remission<br>No fibrosis<br>(n=5) | EoE Remission<br>Fibrosis<br>(n=4) |
|-----------------------------------------------------------------------------------|------------------|------------------------------------|---------------------------------|---------------------------------------|------------------------------------|
| <b>Condition</b>                                                                  |                  |                                    |                                 |                                       |                                    |
| Activity                                                                          | -                | +                                  | +                               | -                                     | -                                  |
| Inflammation                                                                      | -                | +                                  | +                               | -                                     | -                                  |
| Fibrosis                                                                          | -                | -                                  | +                               | -                                     | +                                  |
| <b>Age at collection</b>                                                          |                  |                                    |                                 |                                       |                                    |
| n                                                                                 | 5                | 5                                  | 5                               | 5                                     | 4                                  |
| Mean (sd)                                                                         | 55.20 (11.03)    | 43.60 (3.65)                       | 28.00 (4.24)                    | 44.20 (11.92)                         | 38.25 (6.85)                       |
| Min - max                                                                         | 46.00 - 70.00    | 40.00 - 48.00                      | 25.00 - 35.00                   | 32.00 - 64.00                         | 32.00 - 48.00                      |
| <b>Gender</b>                                                                     |                  |                                    |                                 |                                       |                                    |
| Number of males (%)                                                               | 1 (20%)          | 2 (40%)                            | 5 (100%)                        | 2 (40%)                               | 3 (75%)                            |
| <b>Biopsies origin</b>                                                            |                  |                                    |                                 |                                       |                                    |
| Number of distal (%)                                                              | 4 (80%)          | 4 (80%)                            | 4 (80%)                         | 5 (100%)                              | 2 (50%)                            |
| Number of proximal (%)                                                            | 1 (20%)          | 1 (20%)                            | 1 (20%)                         | 0 (0%)                                | 2 (50%)                            |
| <b>Treatment at collection</b>                                                    |                  |                                    |                                 |                                       |                                    |
| Fluticasone (%)                                                                   | -                | 2 (40%)                            | 2 (40%)                         | 1 (20%)                               | 4 (100%)                           |
| Budesonide (%)                                                                    | -                | 2 (40%)                            | 1 (20%)                         | 2 (40%)                               | -                                  |
| PPI (%)                                                                           | -                | -                                  | 2 (40%)                         | 1 (20%)                               | -                                  |
| Diet (%)                                                                          | -                | 1 (20%)                            | 1 (20%)                         | -                                     | -                                  |
| Dilation (%)                                                                      | -                | -                                  | 2 (40%)                         | 1 (20%)                               | 1 (20%)                            |

**Supplementary Tables available as excel files:**

**Suppl. Table 2 - List of upregulated genes**

**Suppl. Table 3 - List of downregulated genes**

## Suppl. Table 4

|                                  | Fluticasone | Budesonide | PPI | Diet | Time   |
|----------------------------------|-------------|------------|-----|------|--------|
|                                  |             |            |     |      | Months |
| <b>EoE Active no fibrosis</b>    |             |            |     |      |        |
| 1                                |             |            |     | x    | 10     |
| 2                                | x           |            |     |      | 46     |
| 3                                |             | x          |     |      | < 1    |
| 4                                |             | x          |     |      | 5      |
| 5                                |             |            |     |      |        |
| <b>EoE Active fibrosis</b>       |             |            |     |      |        |
| 1                                |             |            |     | x    | 2      |
| 2                                |             | x          |     |      | < 1    |
| 3                                | x           |            |     |      | 9      |
| 4                                | x           |            | x   |      | 29     |
| 5                                |             |            | x   |      | 1      |
| <b>EoE Remission no fibrosis</b> |             |            |     |      |        |
| 1                                |             | x          |     |      | 6      |
| 2                                | x           |            |     |      | 5      |
| 3                                |             |            | x   |      | < 1    |
| 4                                |             |            |     |      |        |
| 5                                |             | x          |     |      | < 1    |
| <b>EoE Remission fibrosis</b>    |             |            |     |      |        |
| 1                                | x           |            |     |      | 16     |
| 2                                | x           |            |     |      | 16     |
| 3                                | x           |            |     |      | 29     |
| 4                                | x           |            |     |      | 27     |

### A) Upregulated

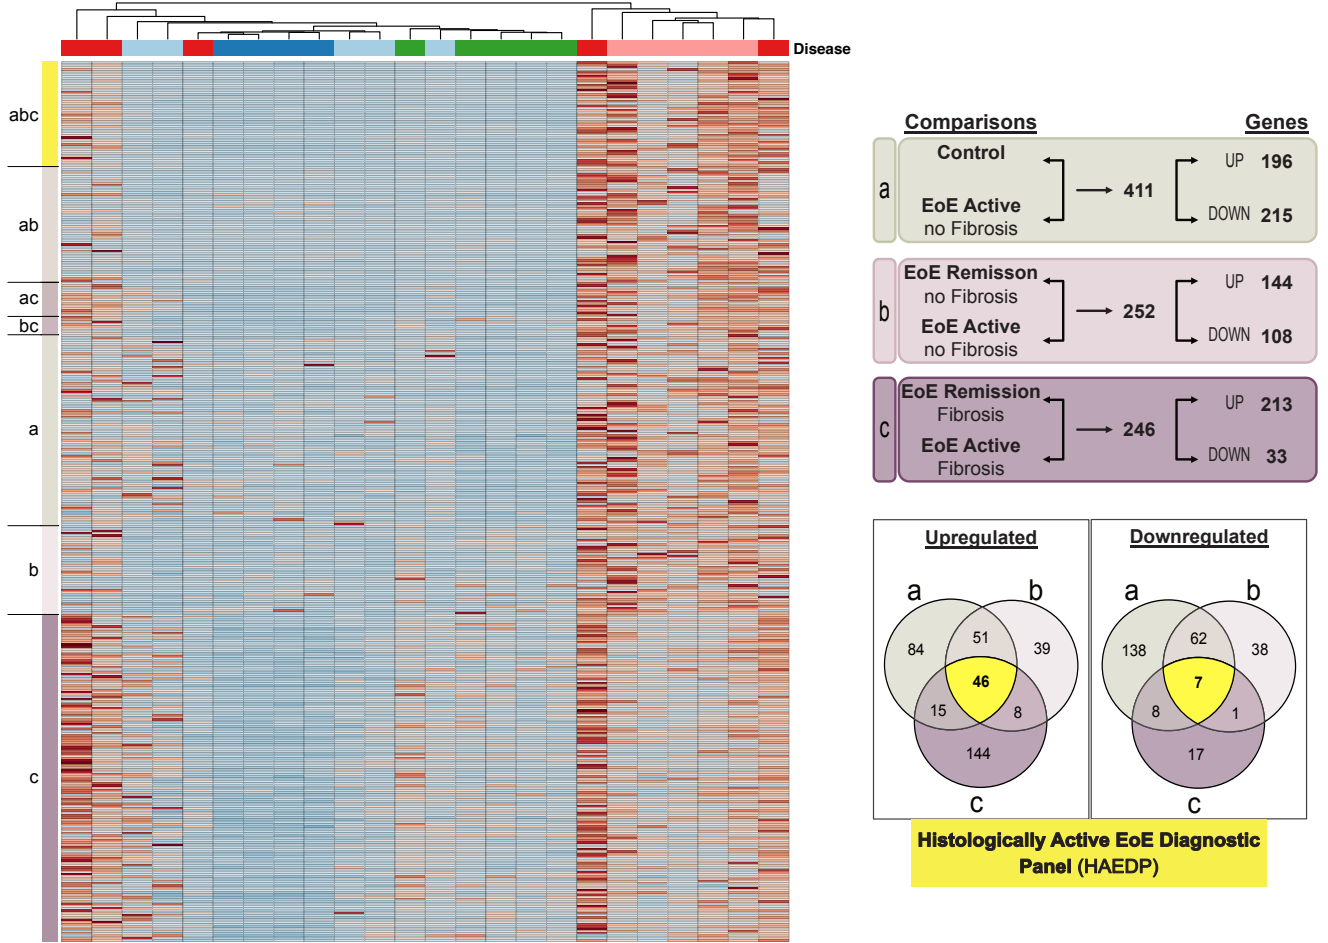

### B) Downregulated

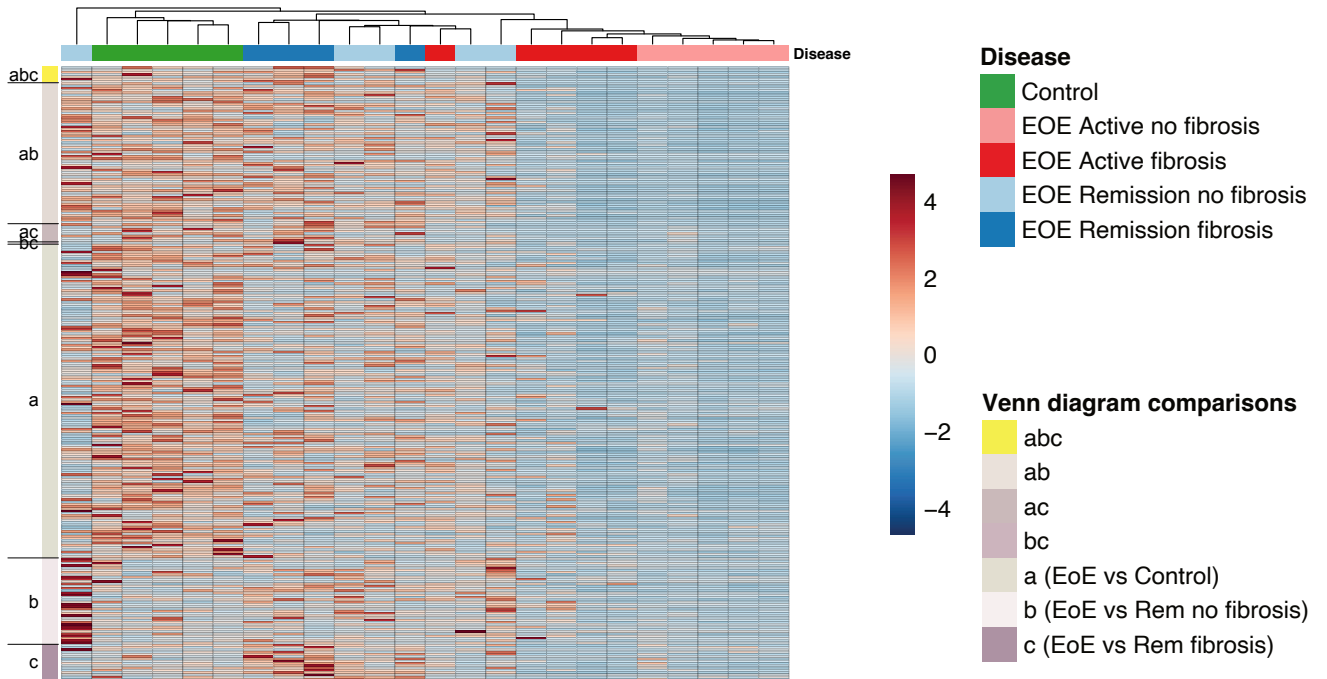

Suppl. Figure 1

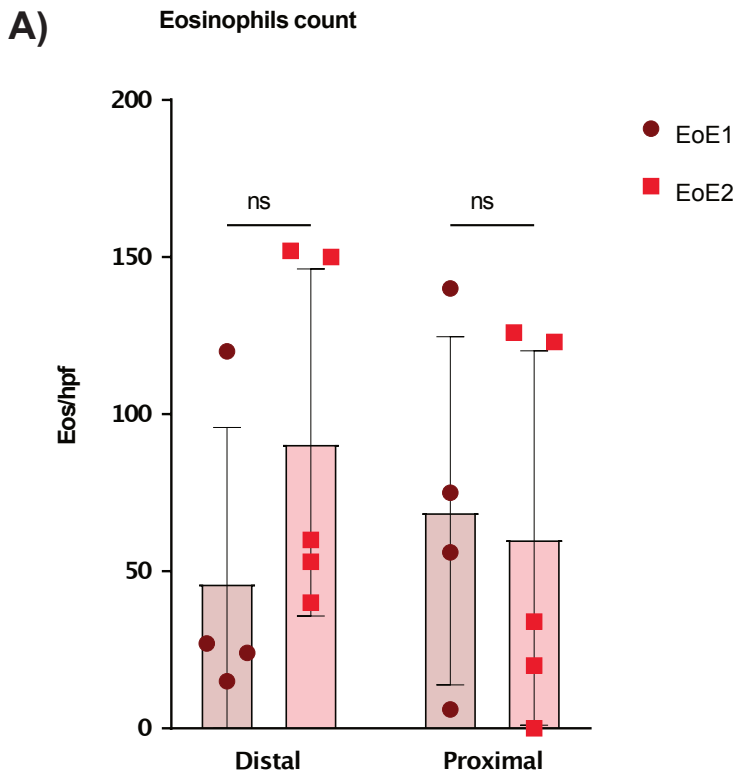

Suppl. Figure 2

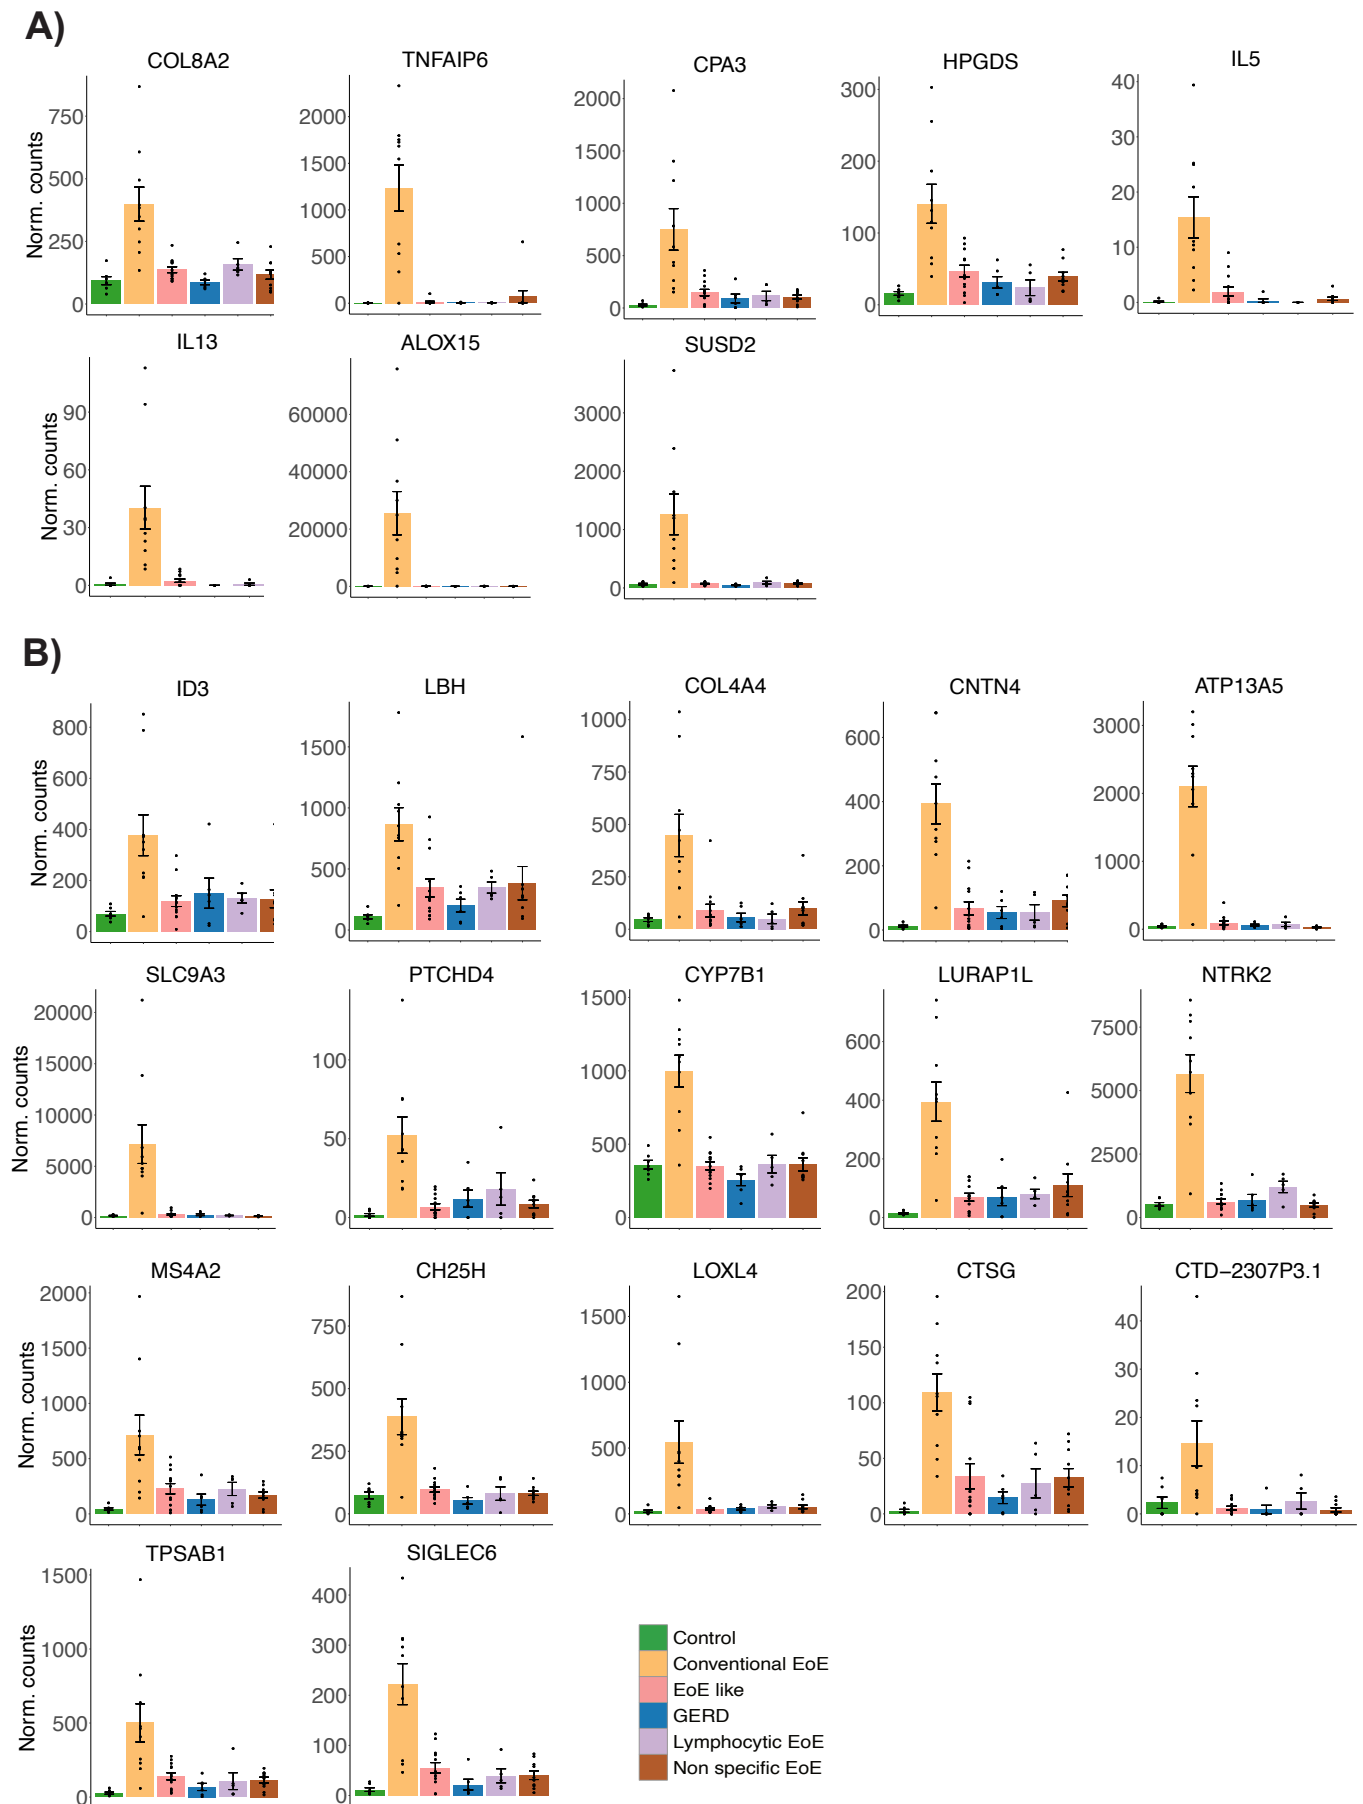

Suppl. Figure 3

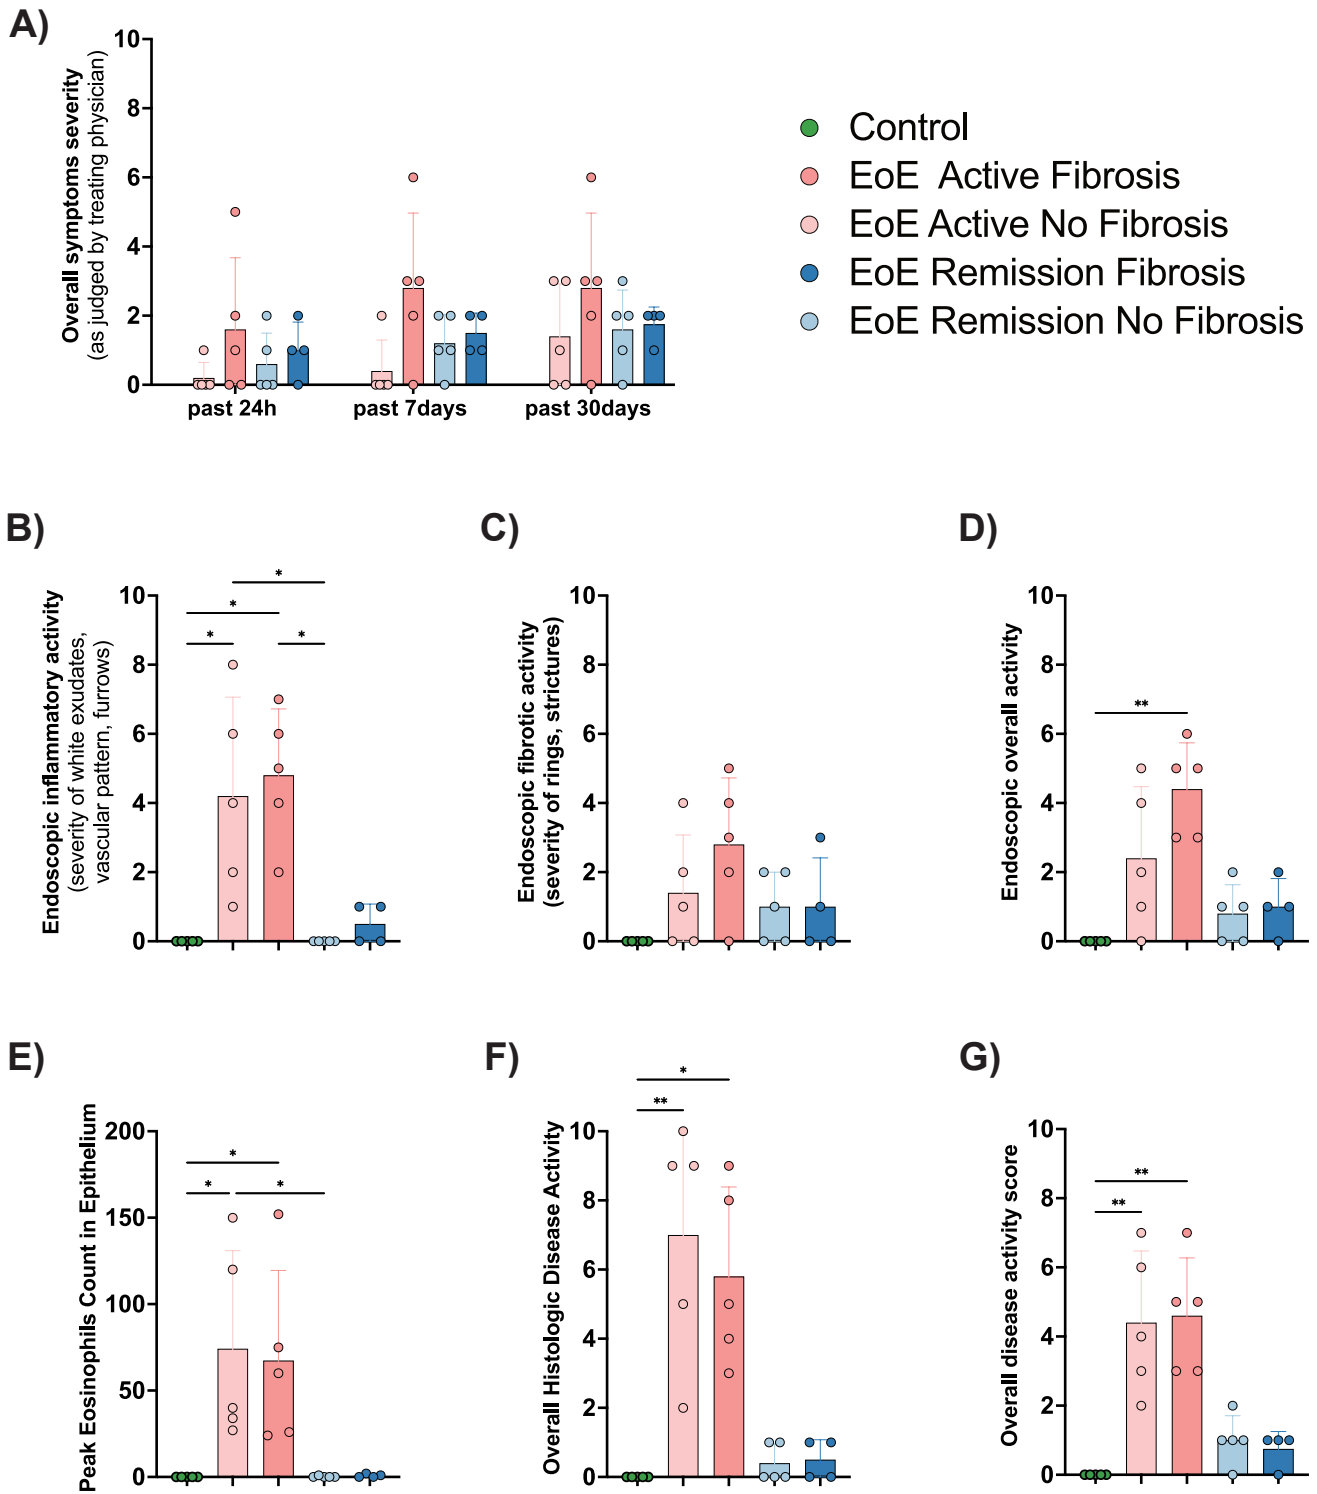

Suppl. Figure 4
